# Supplementary material for: Clinical and imaging factors associated with severe complications of cervical necrotizing fasciitis
Source: Springer Nature journal article supplement (doi:10.1007/s00134-015-3830-1), 2015-05-05
Supplement: MOESM6 [file 8124220]

**Appendix 4: CT scan protocol**

We had added the protocol of CT scan: “The examinations were performed on a 64 detector row CT (64-MDCT) SOMATOM sensation 64. Images were taken after intravenous injection of non-ionic contrast media (2,5ml/s) rate of a total of 45ml administrated by a CT power injection. A second injection was performed 2 minutes latter of 45 ml of contrast media (3ml/s) rate with 50 second of scan delay. CT scan was performed from the skull base to the diaphragm.”
